# Supplementary material for: Development of a 3D, networked multi-user virtual reality environment for home therapy after stroke
Source: PubMed Central journal article supplement (PMC6173932; doi:10.1186/s12984-018-0429-0), 2018-10-05
Supplement: 12984_2018_429_MOESM4_ESM.pdf [file 12984_2018_429_MOESM4_ESM.pdf]

Please circle the type of therapy that best answers each of the following questions.

**HEP** – Home Exercise Program

**AWVR** – Alice in Wonderland Virtual Reality

**VERGE** – Virtual Environment for Rehabilitative Gaming Exercises

1. Which therapy did you find to be the **most engaging?**

HEP

AWVR

VERGE

2. For which therapy did you have the greatest **desire to complete the entire session?**

HEP

AWVR

VERGE

3. For which therapy did you feel you **moved your arm the most?**

HEP

AWVR

VERGE

4. For which therapy were the exercises **easiest to understand?**

HEP

AWVR

VERGE

5. Which therapy did you feel was the **most effective?**

HEP

AWVR

VERGE

6. Which therapy did you **prefer?**

HEP

AWVR

VERGE

7. Which therapy would you be **most likely to continue at home?**

HEP

AWVR

VERGE

8. For each task in the table below, which therapy helped you the most to be able to do the activity better at home (using both hands)?

| Task                  | HEP | AWVR | VERGE | N/A |
|-----------------------|-----|------|-------|-----|
| Washing/drying dishes |     |      |       |     |
| Sweeping the floor    |     |      |       |     |
| Folding laundry       |     |      |       |     |
| Putting on a shirt    |     |      |       |     |
| Eating meals          |     |      |       |     |
| Brushing teeth        |     |      |       |     |

Thank you!
