# Supplementary material for: Development of a 3D, networked multi-user virtual reality environment for home therapy after stroke
Source: Springer Nature journal article supplement (doi:10.1186/s12984-018-0429-0), 2018-10-05
Supplement: MOESM1 [file 16176520]

## Tabletop Exercises

| Position                   | Exercises                                                                                                                                                                                                                                                                                                                                                                                           | Amount |
|----------------------------|-----------------------------------------------------------------------------------------------------------------------------------------------------------------------------------------------------------------------------------------------------------------------------------------------------------------------------------------------------------------------------------------------------|--------|
| <b>Away from the table</b> |                                                                                                                                                                                                                                                                                                                                                                                                     |        |
|                            | <p><b>Shoulder Shrug – Curious Turtle</b><br/>           Shrug BOTH of your shoulders up and down</p> <ul style="list-style-type: none"> <li>• Pull those shoulders down as far away from your ears as possible!</li> </ul>                                                                                                                                                                         | 10x    |
|                            | <p><b>Chest out</b><br/>           Pull both of your shoulders back</p> <ul style="list-style-type: none"> <li>• Squeeze your shoulder blades together</li> <li>• Try to Touch your elbows together behind your back</li> <li>• Keep your shoulders DOWN away from your ears</li> </ul>                                                                                                             | 10x    |
|                            | <p><b>Butterfly</b></p> <ol style="list-style-type: none"> <li>1. Bend your elbows to 90*,</li> <li>2. Pull elbows away from your body</li> <li>3. Then pull them elbows in tight to your body</li> </ol> <ul style="list-style-type: none"> <li>• Like you're 'flapping your wings'</li> <li>• Keep your shoulders down away from your ears</li> <li>• Sit up straight, don't lean back</li> </ul> | 10x    |
|                            | <p><b>Hand to mouth</b><br/>           Move your hand from your lap to your mouth</p> <ul style="list-style-type: none"> <li>• Focus on bending your elbow as much as possible</li> <li>• If you can't reach your mouth, go as far as you can</li> </ul>                                                                                                                                            | 10x    |
|                            | <p><b>Marching Soldier</b><br/>           Let your arm hang at your side, try to raise your arm directly in front of you</p> <ul style="list-style-type: none"> <li>• Keep your elbow as straight as possible</li> <li>• Keep your body still</li> <li>• Lead with your thumb if possible</li> <li>• Use a weight if it's too easy</li> </ul>                                                       | 10x    |

|                                                          |                                                                                                                                                                                                                                                                                                                                                                                                                               |                                                      |
|----------------------------------------------------------|-------------------------------------------------------------------------------------------------------------------------------------------------------------------------------------------------------------------------------------------------------------------------------------------------------------------------------------------------------------------------------------------------------------------------------|------------------------------------------------------|
| <b>At the table</b>                                      | Too easy? Do these with wrist weights on.                                                                                                                                                                                                                                                                                                                                                                                     |                                                      |
| Directly facing table<br><br>Washcloth under hand        | <b>Wipe the table:</b><br>Put your hand flat on the table. Trace LINE #1 <ul style="list-style-type: none"> <li>• Keep your body still</li> <li>• Just move your arm</li> </ul>                                                                                                                                                                                                                                               | 10x                                                  |
| 45* to table<br><br>Washcloth under elbow (optional)     | <b>Lift Hand</b><br>Put your elbow on the table (on the "x"), then lift your hand as high as you can <ul style="list-style-type: none"> <li>• Keep your elbow on the table, don't let it come up!</li> <li>• Keep your body as still as possible</li> <li>• Too easy? Try palm facing up (toward your face)</li> </ul>                                                                                                        | 10x                                                  |
| Directly facing table<br><br>Washcloth under hand        | <b>Place your bet</b><br>Push your hand forward as far as you can, and then you're your hand back to the edge of the table <ul style="list-style-type: none"> <li>• Trace LINE #2</li> <li>• Keep your body still, just move your arm</li> <li>• Try to straighten your elbow as much as possible</li> </ul>                                                                                                                  | 10x                                                  |
| 45* to table<br><br>Elbow on the "x"<br><br>Foam in hand | <b>Ready to eat</b><br>1. Start with the fork resting on the table<br>2. Turn it upward so it is straight up and down (perpendicular to the table)<br>3. Return it SLOWLY to resting flat on the table. <ul style="list-style-type: none"> <li>• Keep your body still</li> <li>• Too easy? <ul style="list-style-type: none"> <li>○ Use an umbrella</li> <li>○ Turn the fork all the way (180 degrees)</li> </ul> </li> </ul> | 10x                                                  |
| 45* to table<br><br>Cup in hand                          | <b>Thirsty</b><br>Bring the cup to your mouth <ul style="list-style-type: none"> <li>• With elbow on "x", keeping it on table throughout movement</li> <li>• Away from the table, starting with your hand in your lap</li> <li>• Try to keep the cup up and down as if you're going to drink from a straw.</li> </ul>                                                                                                         | - 10x with elbow on "x"<br><br>-10x with hand in lap |
| Facing table directly                                    | <b>How fast?</b><br>Reach your hand to each tape dot, in order (1-10)<br>Now do this again as quickly as you can. Use the stopwatch in your other hand and write down your time.                                                                                                                                                                                                                                              | -10x warm up<br><br>-10x as fast as possible!        |

| <b>Theraband Exercises</b> |                                                                                                                                                                                                                                                                                                                                                                                                                                                                                    |                                                                                                                                                       |
|----------------------------|------------------------------------------------------------------------------------------------------------------------------------------------------------------------------------------------------------------------------------------------------------------------------------------------------------------------------------------------------------------------------------------------------------------------------------------------------------------------------------|-------------------------------------------------------------------------------------------------------------------------------------------------------|
| <b>Position:</b>           | <ul style="list-style-type: none"> <li>- Sit in a chair</li> <li>- Feet flat</li> <li>- Back and hips to the back of the chair</li> </ul>                                                                                                                                                                                                                                                                                                                                          | <ul style="list-style-type: none"> <li>- Wrap theraband around both hands</li> <li>- If it's too easy use red theraband (yellow is easier)</li> </ul> |
|                            | <b>Pull up</b> <ul style="list-style-type: none"> <li>- Hold your unaffected hand in your lap, keep it there</li> <li>- Pull up with your affected hand</li> <li>- Keep your elbow as straight as you can</li> </ul>                                                                                                                                                                                                                                                               | 10x                                                                                                                                                   |
|                            | <b>Pull out</b> <ul style="list-style-type: none"> <li>- Start with both hands in the center</li> <li>- Pull both hands to the side</li> <li>- Make the theraband stretch as long as possible!</li> </ul>                                                                                                                                                                                                                                                                          | 10x                                                                                                                                                   |
|                            | <b>Start the lawn mower</b> <ol style="list-style-type: none"> <li>1. Start with both hands in your lap</li> <li>2. Lead with your elbow, hand palm face down</li> <li>3. Pull up and across your body like you are starting a lawn mower <ul style="list-style-type: none"> <li>- Keep you hand close to your chest</li> <li>- Pull your shoulder blade back</li> <li>- Stick your chest out!</li> <li>- Your elbow should be the highest part of your arm</li> </ul> </li> </ol> | 10x                                                                                                                                                   |
