# Supplementary material for: Development of a 3D, networked multi-user virtual reality environment for home therapy after stroke
Source: Springer Nature journal article supplement (doi:10.1186/s12984-018-0429-0), 2018-10-05
Supplement: MOESM2 [file 16176520]

**The following survey is about your experience with the Multi-user virtual reality game only. Please circle the best answer for each of the following questions.**

1. For the multi-user VR, which exercise did you prefer?

- Ball game                       Tracing                       Food fight

Why? (Please specify using 3 keywords)

\_\_\_\_\_

2. For the multi-user VR, how helpful did you find the audio connection option?

- Extremely      Very      Somewhat      Not really      Not at all

3. For the multi-user VR, did you enjoy having the other player present?

- Extremely      Very      Somewhat      Not really      Not at all

4. For the multi-user VR, how much did you like the graphics of the game 3D environment?

- Extremely      Very      Somewhat      Not really      Not at all

5. For the multi-user VR, would you enjoy the game more if the 3D kitchen environment would be an exact replica of your own kitchen?

- Extremely      Very      Somewhat      Not really      Not at all

6. Would you recommend any other exercises?

\_\_\_\_\_  
\_\_\_\_\_

**For Questions 7 and 8, how much do you agree with the following statements?**

7. "It would be great if this rehabilitation program was accessible from my home 24/7."

- Strongly Agree      Agree      Neither Agree Nor Disagree      Disagree      Strongly Disagree

8. "I have better motivation for my training sessions if I train with my virtual partner rather than alone"

- Strongly Agree      Agree      Neither Agree Nor Disagree      Disagree      Strongly Disagree

**Thank you!**
