# Supplementary material for: Development of a 3D, networked multi-user virtual reality environment for home therapy after stroke
Source: Springer Nature journal article supplement (doi:10.1186/s12984-018-0429-0), 2018-10-05
Supplement: MOESM3 [file 16176520]

WEEKLY SURVEY

**Please take a few moments to complete this questionnaire. Feel free to ask for clarification when answering any of the items. Your honest answers and comments to all questions will be very helpful to our research team as we develop rehabilitation programs.**

1. Which type of therapy did you participate in this week? Circle your choice.

**Home Exercise Program (HEP)**

**Alice in Wonderland VR (AWVR)**

**Virtual Environment for Rehabilitative Gaming Exercises (VERGE)**

2. From your perspective, how important are the following outcomes in your rehabilitation training?

|                                                                                  | Very Important | Important | Neutral | Somewhat Important | Not Important |
|----------------------------------------------------------------------------------|----------------|-----------|---------|--------------------|---------------|
| Ability to do the exercises faster                                               |                |           |         |                    |               |
| Sense of personal progress                                                       |                |           |         |                    |               |
| Better performance of activities of daily living (e.g. getting dressed, eating,) |                |           |         |                    |               |
| Ability to do new tasks                                                          |                |           |         |                    |               |
| Greater arm/hand movement                                                        |                |           |         |                    |               |
| Other, please explain in the space below                                         |                |           |         |                    |               |

---

---

---

3. Using three words or short phrases, describe your experience using this program:

---

WEEKLY SURVEY

4. How interesting or stimulating did you find this therapy?

Extremely      Very      Somewhat      Not really      Not at all

5. How helpful did you find this therapy in for using your arm and hand?

Extremely      Very      Somewhat      Not really      Not at all

6. How can we make this therapy better?

---



---



---

7. When you think about the therapy you had this week, how satisfied are you with:

|                                          | Very Satisfied | Satisfied | Neither Satisfied nor Dissatisfied | Dissatisfied | Very Dissatisfied |
|------------------------------------------|----------------|-----------|------------------------------------|--------------|-------------------|
| Ease of use                              |                |           |                                    |              |                   |
| How well it kept your attention          |                |           |                                    |              |                   |
| Your desire to complete training         |                |           |                                    |              |                   |
| Your sense of progress                   |                |           |                                    |              |                   |
| Amount of arm use during therapy         |                |           |                                    |              |                   |
| Time spent in therapy                    |                |           |                                    |              |                   |
| Other, please explain in the space below |                |           |                                    |              |                   |

---



---



---

For questions 8 and 9, compare **1 week** of this therapy to **1 week** of other types of therapy you received for your arm in the past.

8. How much progress did you experience during this therapy?

Much More      More      Same      Less      Much Less

WEEKLY SURVEY

9. How much did you move your arm this therapy?

Much More                      More                      Same                      Less                      Much Less

10. Would you choose to continue this form of therapy at home?

Definitely                      Probably                      Not Sure                      Probably Not                      Definitely Not

11. How often do you think you would complete these exercises at home?

6-7 times/week                      4-5 times/week                      2-3times/week                      Once/week                      Never

12. What would limit you from doing all recommended training sessions at home with this therapy (check all that apply)?

- Nothing – I would do them
- Too complicated to play
- Too boring
- Too frustrating
- I am too busy
- I would forget to do them
- I would rather do something else
- Other (please specify) \_\_\_\_\_

13. Based on your experience, please rate the rehabilitation potential you see in this type of therapy:

Excellent                      Good                      Moderate                      Small                      None

14. Please share ideas you have to improve this treatment.

---

---

---

15. Please share any further thoughts about this rehabilitation experience using keywords or short phrases.

---

---

---

Thank you!
